# Supplementary material for: Chemical synthesis of the outer core oligosaccharide of Escherichia coli R3 and immunological evaluation
Source: Royal Society of Chemistry journal article supplement (doi:10.1039/c5ob00177c), 2015-01-01

## Supplementary Information

### Chemical Synthesis of Outer Core Oligosaccharide of *Escherichia coli* R3 and Immunological Evaluation

Wenjing Shang,<sup>a†</sup> Zhongying Xiao,<sup>b†</sup> Zaikuan Yu,<sup>b†</sup> Na Wei,<sup>b</sup> Guohui Zhao,<sup>b</sup> Qing Zhang,<sup>b</sup> Mohui Wei,<sup>b</sup> Xuan Wang,<sup>b</sup> Peng George Wang,<sup>\*a, b</sup> and Tiehai Li<sup>\*b</sup>

|                                                                                      |     |
|--------------------------------------------------------------------------------------|-----|
| <sup>1</sup> H NMR and <sup>13</sup> C NMR spectra of compound <b>6</b>              | S2  |
| <sup>1</sup> H NMR and <sup>13</sup> C NMR spectra of compound <b>9</b>              | S3  |
| <sup>1</sup> H NMR and <sup>13</sup> C NMR spectra of compound <b>10</b>             | S4  |
| <sup>1</sup> H NMR and <sup>13</sup> C NMR spectra of compound <b>12</b>             | S5  |
| <sup>1</sup> H NMR and <sup>13</sup> C NMR spectra of compound <b>13</b>             | S6  |
| <sup>1</sup> H NMR and <sup>13</sup> C NMR spectra of compound <b>16</b>             | S7  |
| <sup>1</sup> H NMR and <sup>13</sup> C NMR spectra of compound <b>1</b>              | S8  |
| ESI HRMS of compound <b>1</b>                                                        | S9  |
| ESI HRMS of active ester modified pentasaccharide                                    | S9  |
| MALDI-TOF mass analysis of CRM <sub>197</sub> and pentasaccharide-CRM <sub>197</sub> | S10 |
| SDS Gel analysis of CRM <sub>197</sub> and pentasaccharide-CRM <sub>197</sub>        | S10 |
| MALDI-TOF mass analysis of BSA and pentasaccharide-BSA                               | S10 |
| SDS Gel analysis of BSA and pentasaccharide-BSA                                      | S10 |

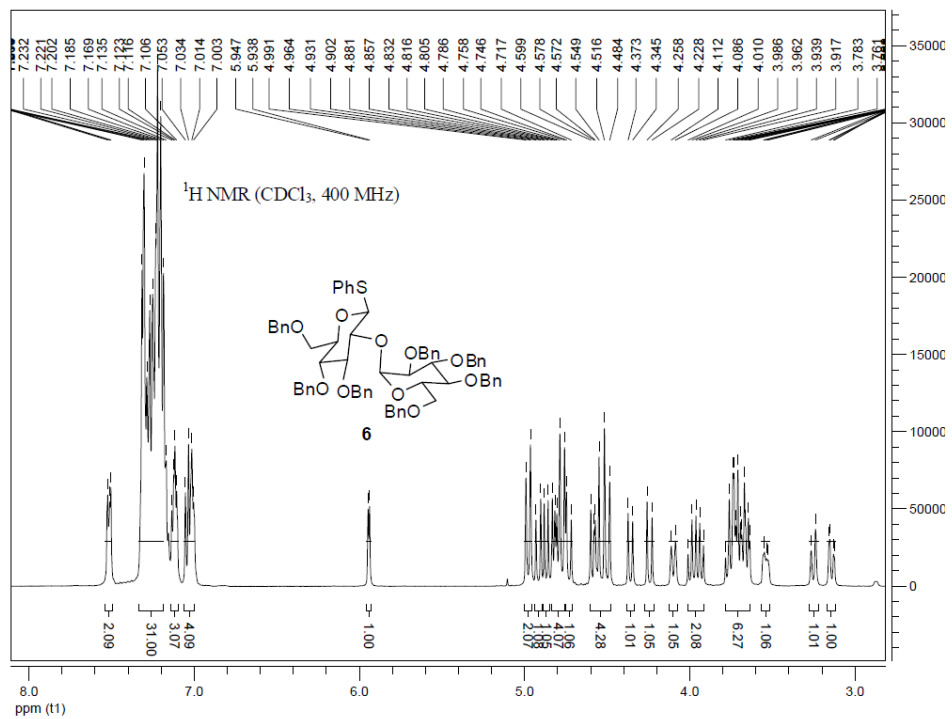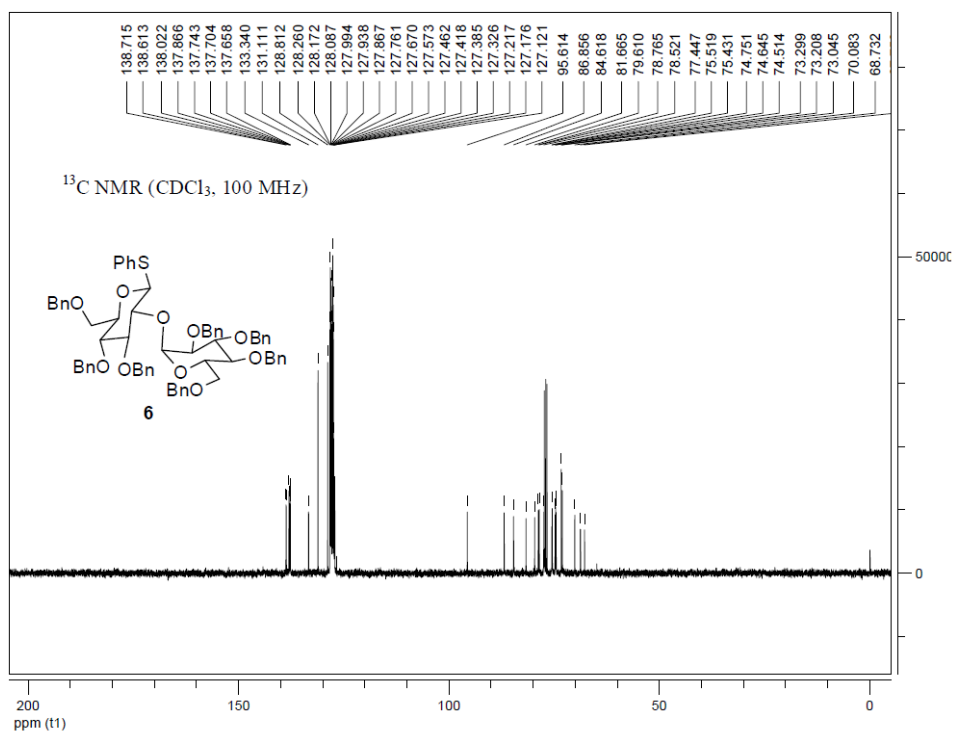

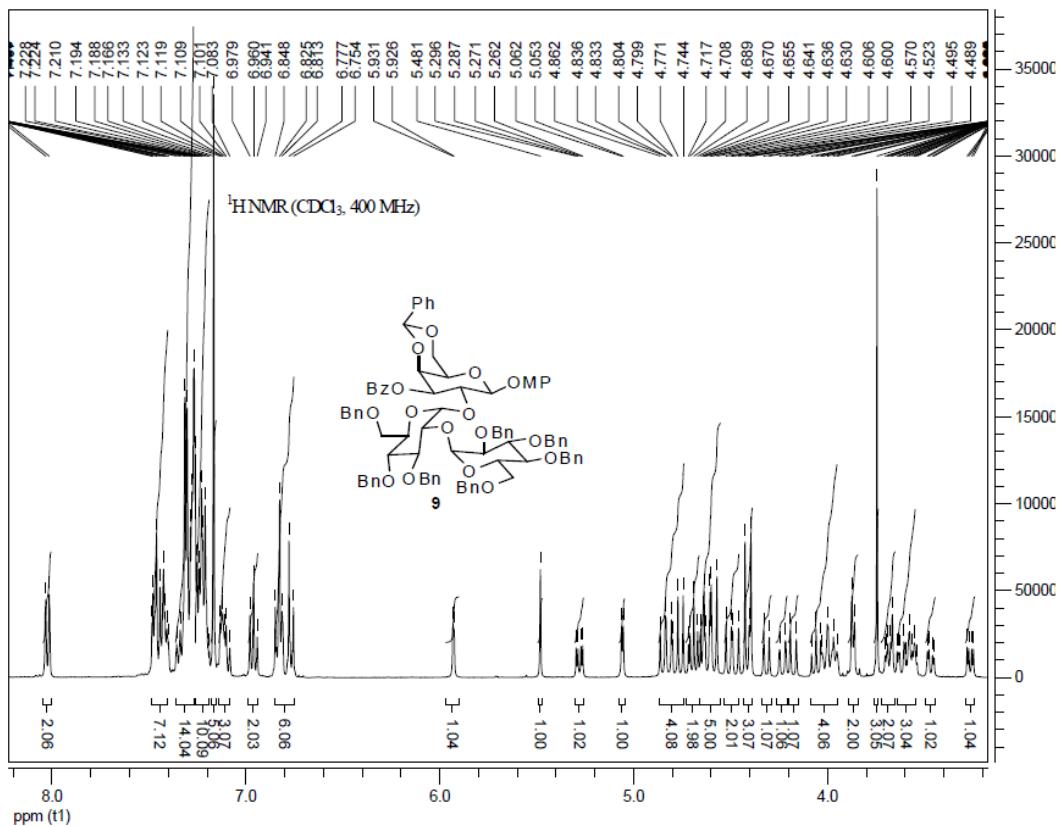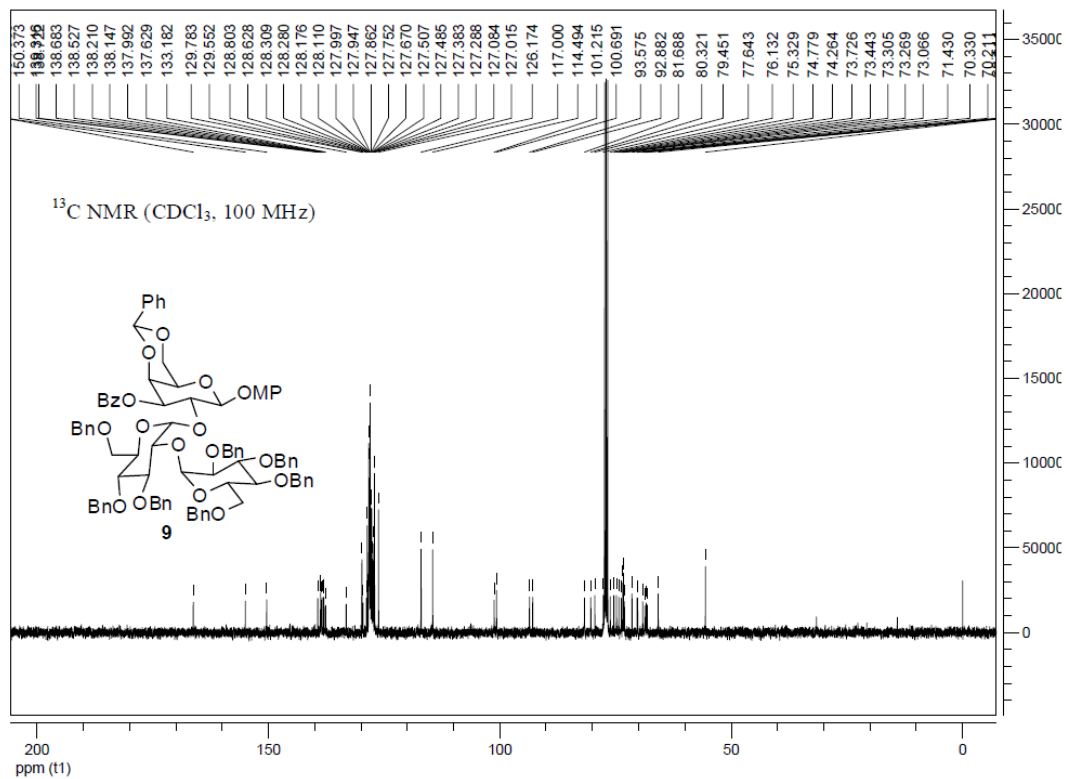

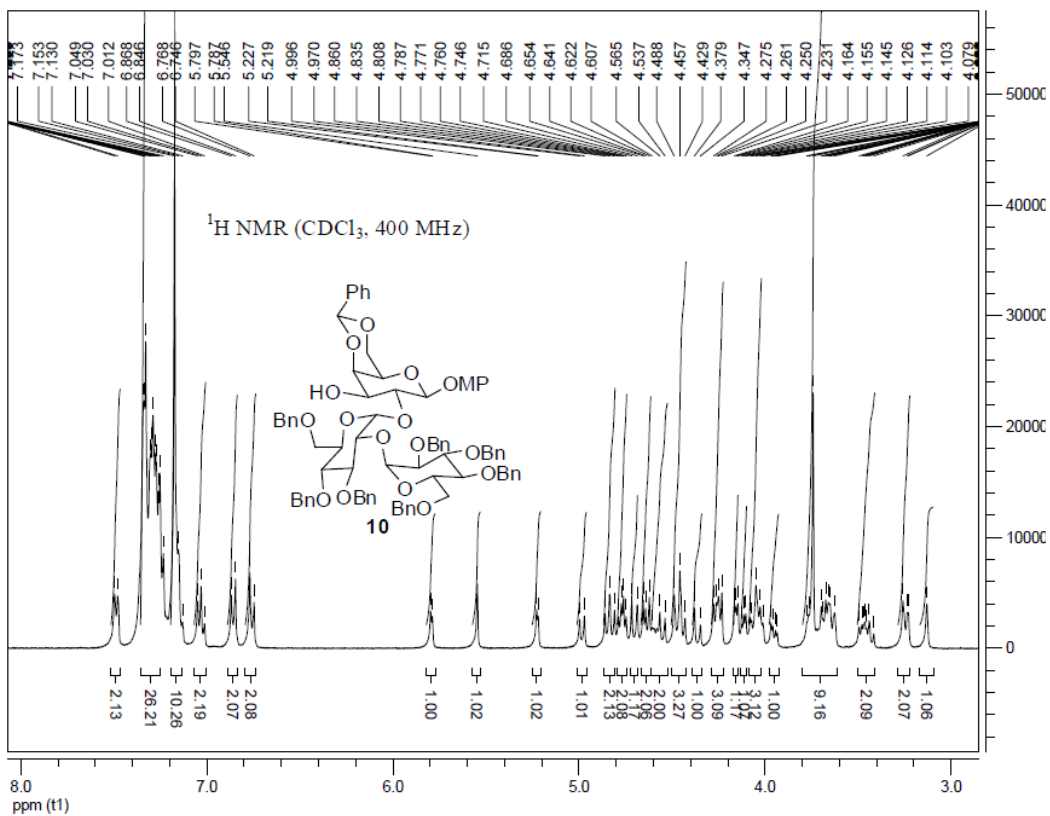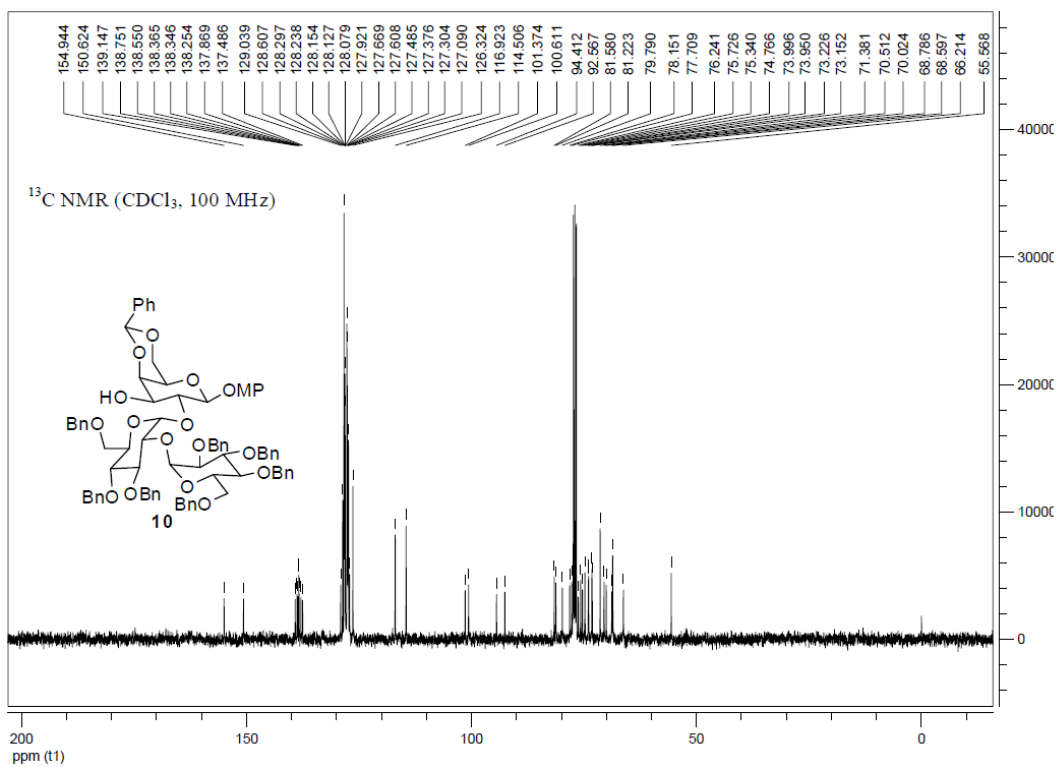

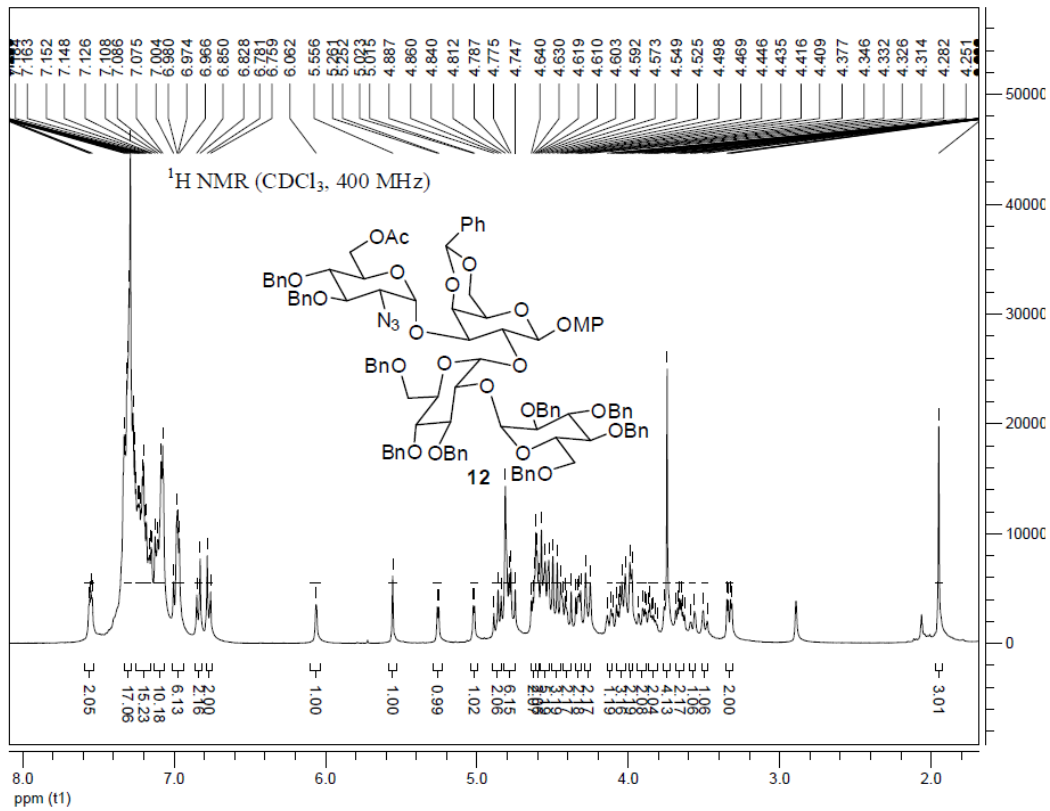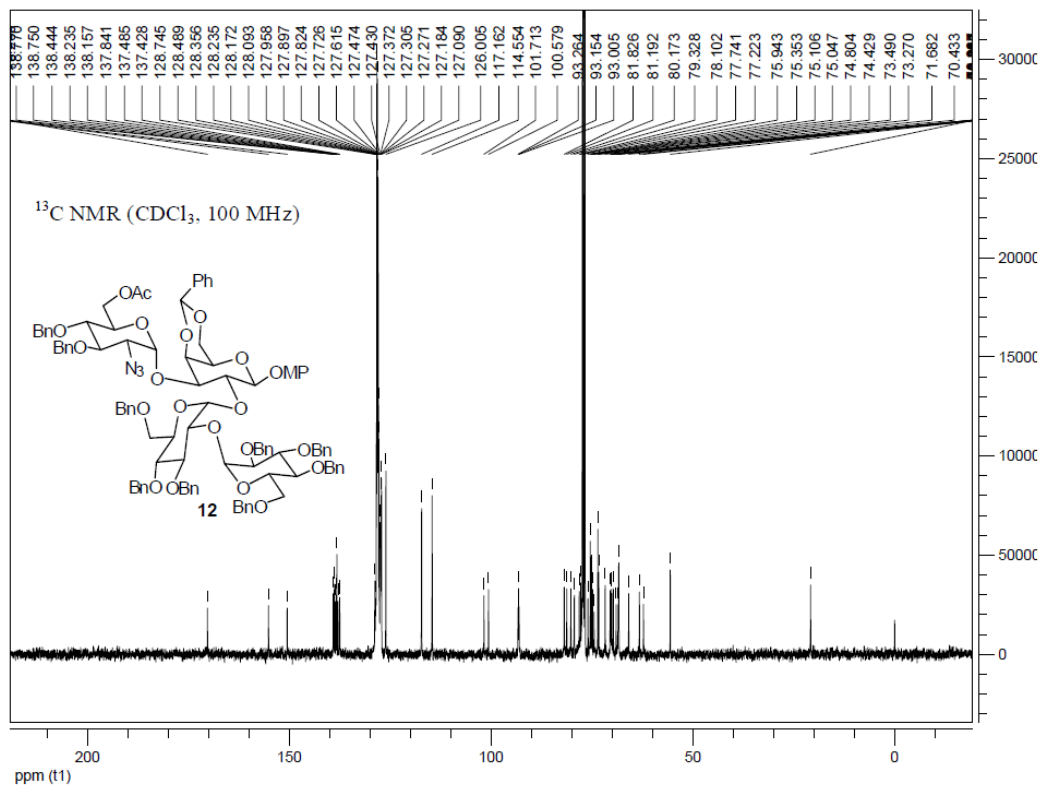

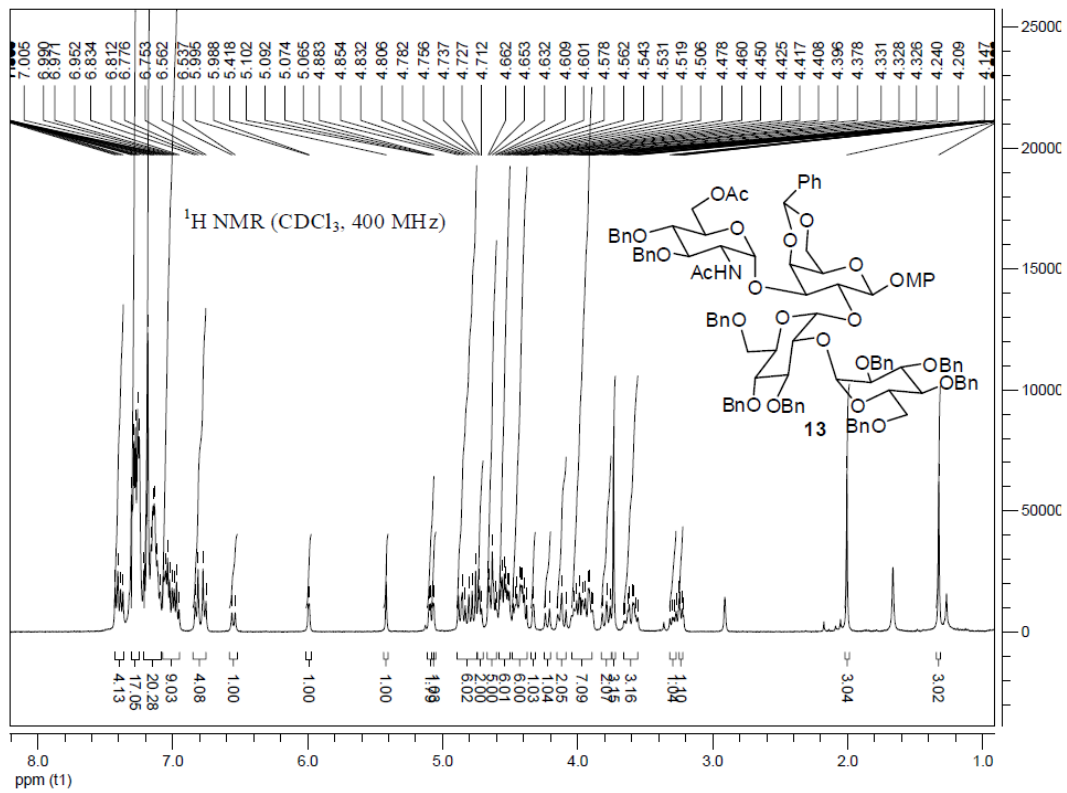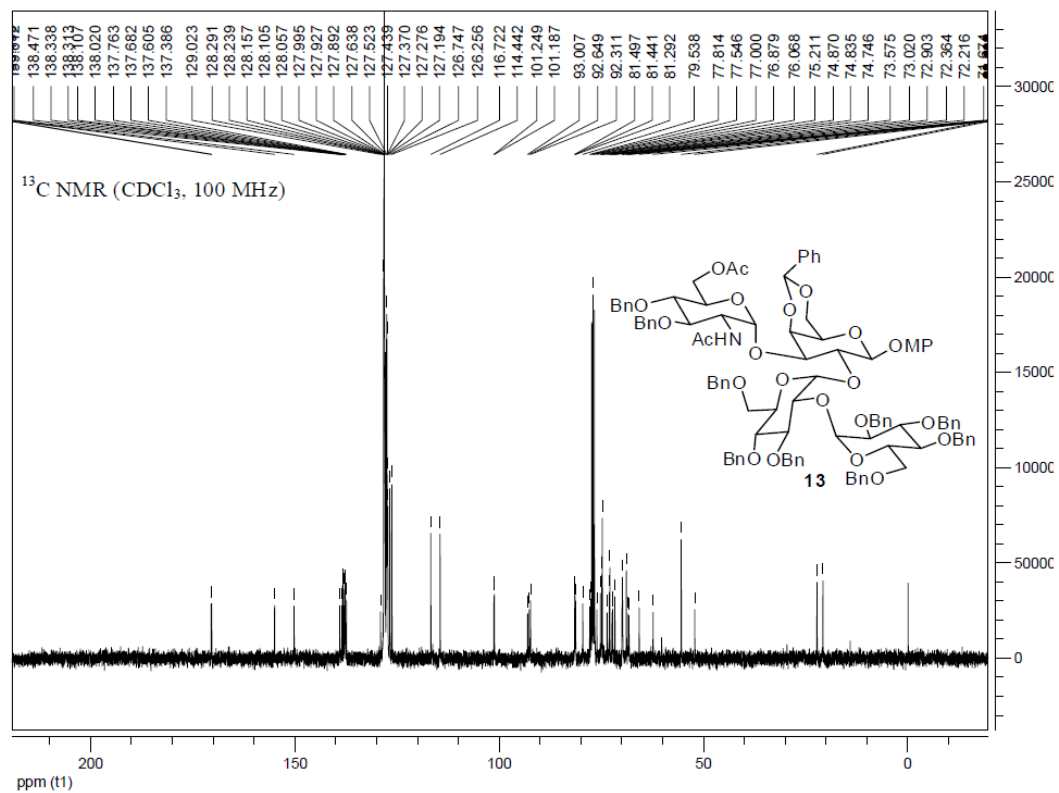

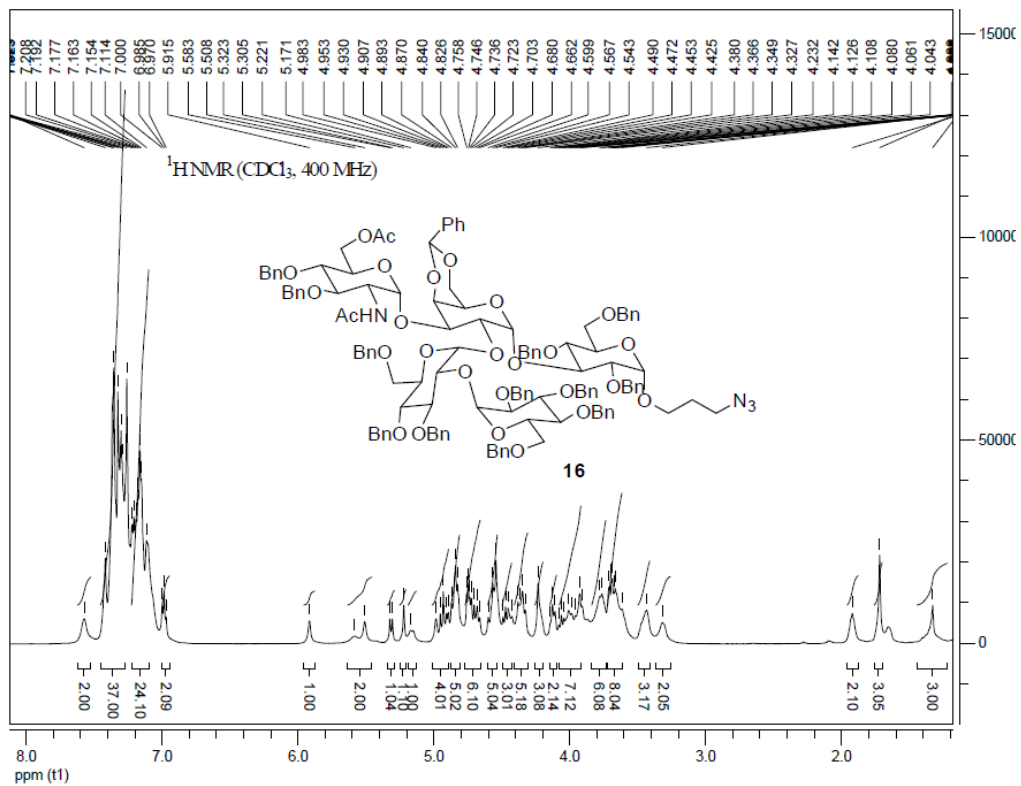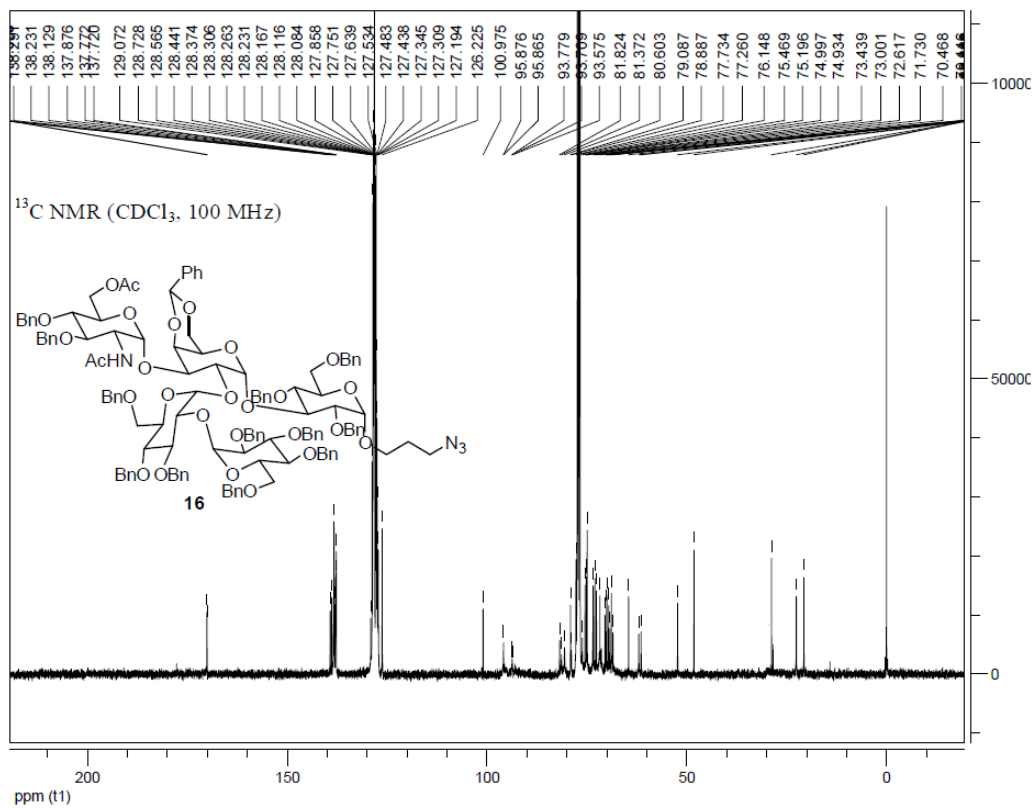





# ESI HRMS of 1 and active ester modified pentasaccharide

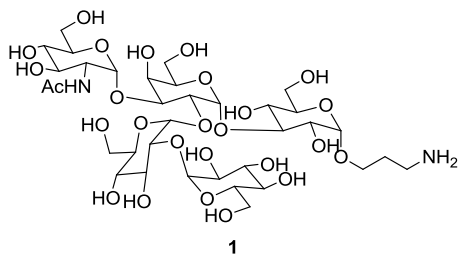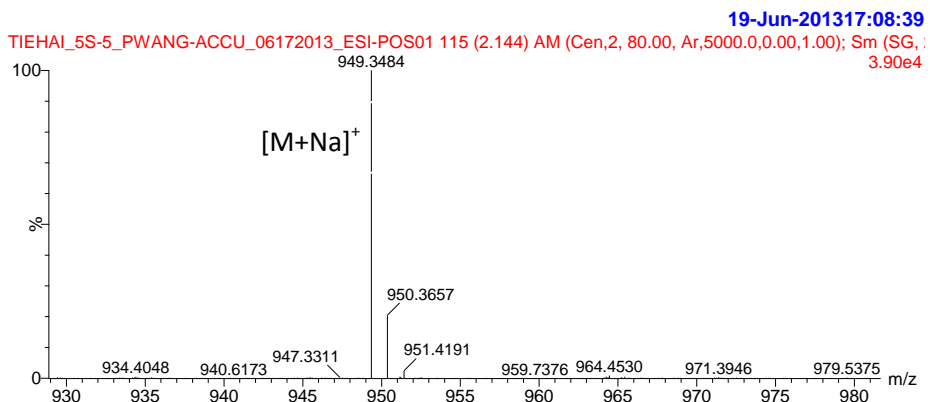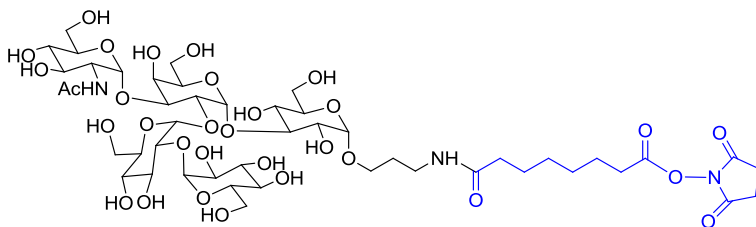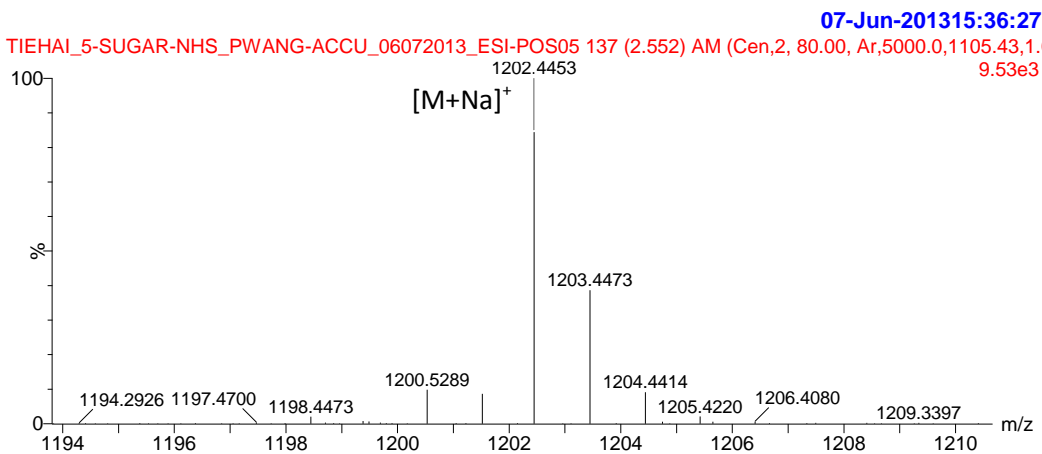

**MALDI-TOF mass (A) and SDS-PAGE (B) analysis of CRM<sub>197</sub> and pentasaccharide-CRM<sub>197</sub> (Figure S1)**

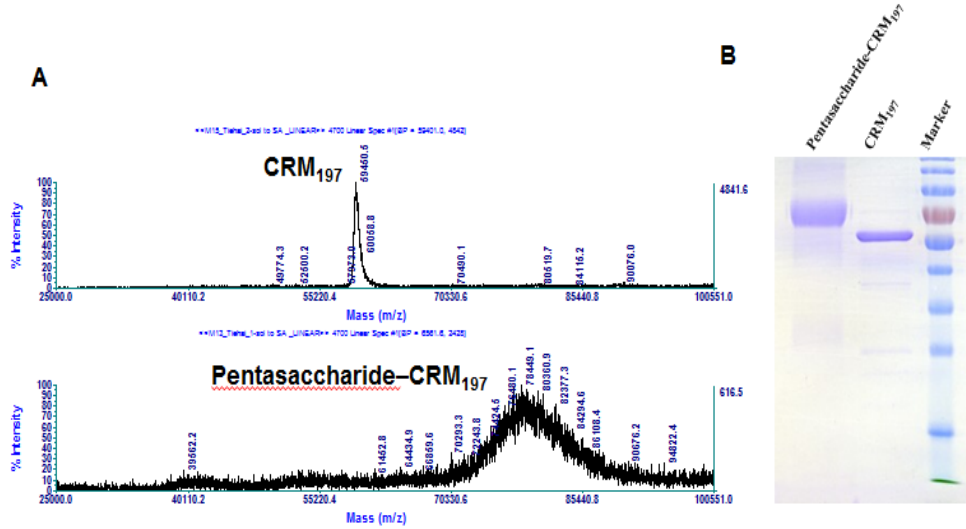

**MALDI-TOF mass (A) and SDS-PAGE (B) analysis of BSA and pentasaccharide-BSA (Figure S2)**

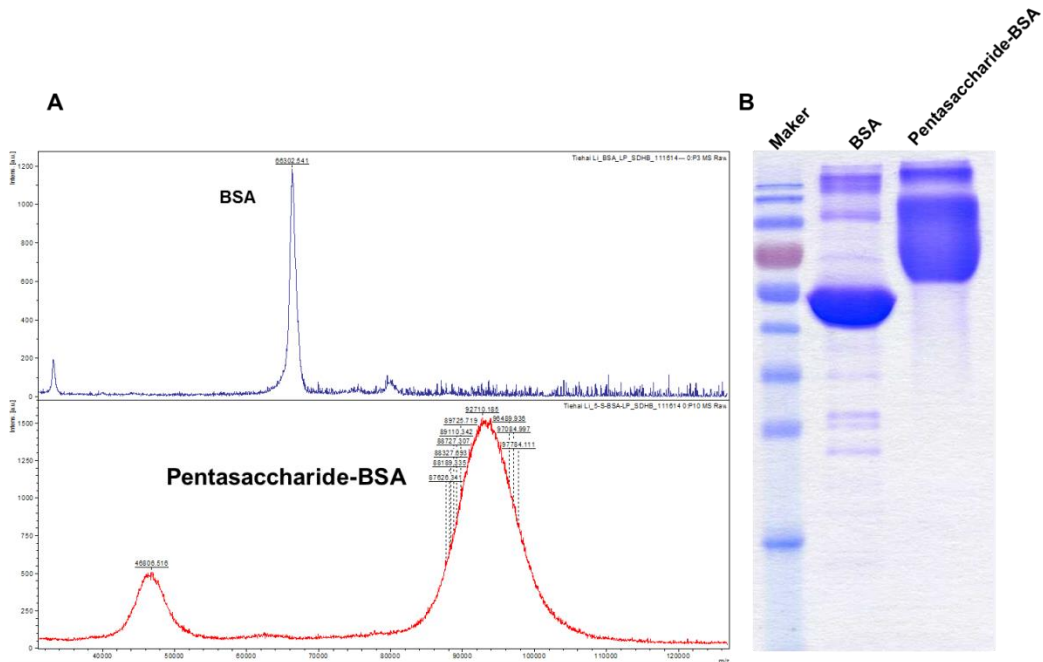

Supplement: c5ob00177c1.pdf [file c5ob00177c1.pdf]
